# Supplementary material for: Bone Marrow–Harvesting Technique Influences Functional Heterogeneity of Mesenchymal Stem/Stromal Cells and Cartilage Regeneration
Source: PubMed Central journal article supplement — Am J Sports Med. 2018 Nov 12;46(14):3521–31. doi: 10.1177/0363546518804807 (PMC6282158; doi:10.1177/0363546518804807), 2018-11-12
Supplement: DS_10.1177_0363546518804807.pdf [file DS_10.1177_0363546518804807.pdf]

**Appendix Table A1. Comparison of freshly isolated nucleated cells from aspirated bone marrow and bone marrow obtained after rasping**

| Donor  | Total no. of nucleated cells per ml |                       | % of CD45- (CD45+) cells |                | Total no. of CD271+CD56+ cells per ml |       | Total no. of CD271+CD56- cells per ml |        |
|--------|-------------------------------------|-----------------------|--------------------------|----------------|---------------------------------------|-------|---------------------------------------|--------|
|        | Aspirate                            | Rasp                  | Aspirate                 | Rasp           | Aspirate                              | Rasp  | Aspirate                              | Rasp   |
| 1      | 0.13 x 10 <sup>7</sup>              | 0.7 x 10 <sup>7</sup> | 11.4<br>(88.6)           | 11.0<br>(89)   | 26.7                                  | 233.3 | 46.7                                  | 1750.0 |
| 2      | 0.23 x 10 <sup>7</sup>              | 0.6 x 10 <sup>7</sup> | 16.0<br>(84)             | 9.5<br>(90.5)  | 7.0                                   | 300.0 | 396.7                                 | 6100.0 |
| 3      | 0.4 x 10 <sup>7</sup>               | 0.8 x 10 <sup>7</sup> | 9.0 (91)                 | 13.4<br>(86.6) | 0.0                                   | 266.7 | 400.0                                 | 2266.7 |
| 4      | 0.4 x 10 <sup>7</sup>               | 0.3 x 10 <sup>7</sup> | 13.0<br>(87)             | 18.2<br>(81.8) | 36.0                                  | 200.0 | 600.0                                 | 1450.0 |
| 5      | 0.26 x 10 <sup>7</sup>              | 0.9 x 10 <sup>7</sup> | 5.3<br>(94.7)            | 16.0<br>(84)   | 8.0                                   | 120.0 | 106.7                                 | 3000.0 |
| 6      | 0.23 x 10 <sup>7</sup>              | 0.7 x 10 <sup>7</sup> | 80.0*                    | 60.0*          | 4.7                                   | 466.7 | 513.3                                 | 1400.0 |
| Median | 0.4 x 10 <sup>7</sup>               | 0.7 x 10 <sup>7</sup> | 11.4<br>(88.6)           | 13.4<br>(86.6) | 8                                     | 250   | 398                                   | 2008   |

\* Contamination with RBCs

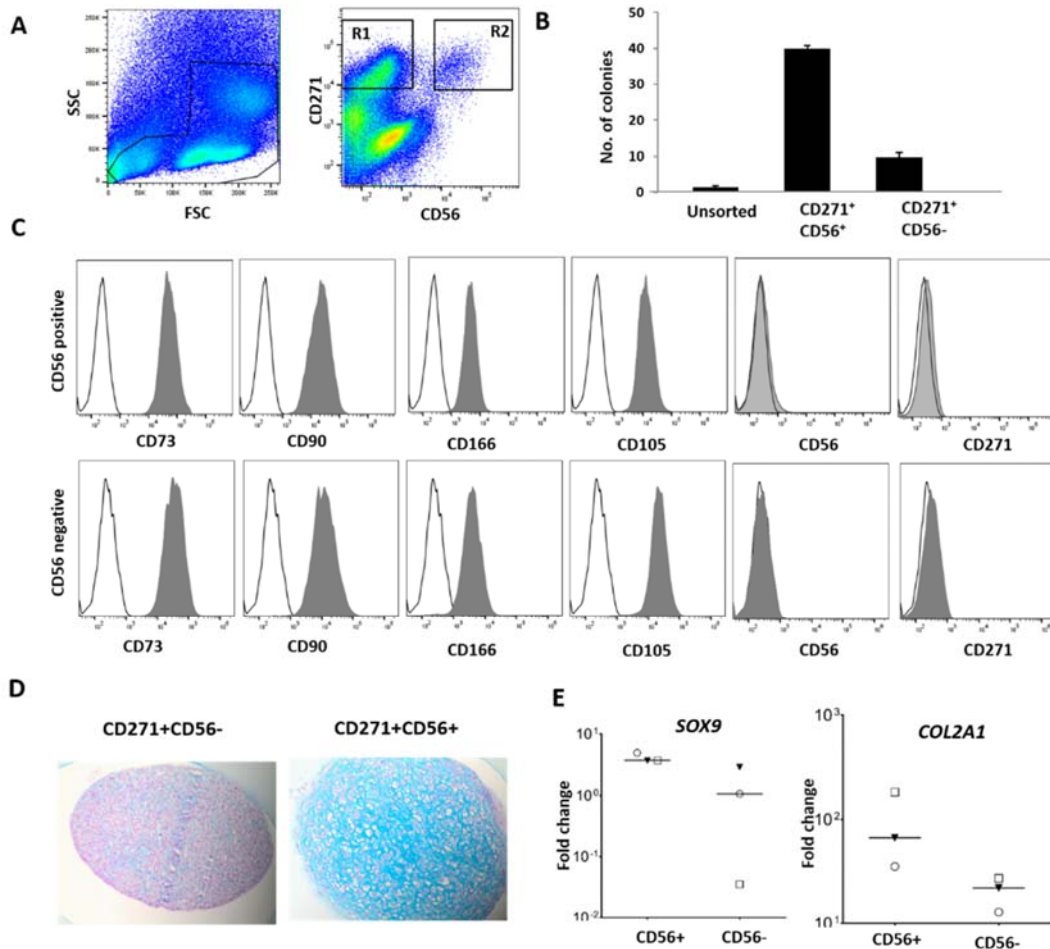

**Supplementary Figure 1: Enumeration of MSCs derived from FACS sorted CD271+CD56+ and CD271+CD56- CTPs.** A) Display of BM cells stained with CD271 and CD56. Sort windows R1 and R2 were set as indicated. B) Display of CFU-F numbers derived from 2000 FACS sorted or 100000 unfractionated BM cells. C) Expression of selected markers in Passage 3 on cultured MSCs derived from CD271+CD56- and CD271+CD56+ CTPs. D) Passage 2 expanded MSCs were induced for chondrogenic differentiation and after 28 days the pellets were stained with Alcian blue. E) Expression of chondrogenic markers *SOX9* and *COL2A1* in cultures derived from CD271+CD56+ and CD271+CD56- sorted fractions after 21 days of chondrogenic induction quantified by qPCR. Gene expression was normalised to HPRT1 and results expressed as mean  $\pm$  SD (n=3).
